# Supplementary material for: The pro-domain of the zebrafish Nodal-related protein Cyclops regulates its signaling activities
Source: Oxford University Press journal article supplement (doi:10.1242/dev.019794), 2008-06-26
Supplement: dev019794-sup-019794-tables3.pdf [file dev019794-sup-019794-tables3.pdf]

**Table S3. Deletions in the Cyc pro-domain affect its potency to induce *gsc***

| RNA injected at the one-cell stage | Dose (pg) | <i>n</i> | I (%) | II (%) | III (%) | IV (%) |
|------------------------------------|-----------|----------|-------|--------|---------|--------|
| Cyc+                               | 1.25      | 114      | 30    | 50     | 20      |        |
| CycΔ 1                             | 1.25      | 107      | 20    | 45     | 35      |        |
| CycΔ 2                             | 1.25      | 125      |       | 15     | 45      | 40     |
| CycΔ 3                             | 1.25      | 116      | 70    | 30     |         |        |
| CycΔ 4                             | 1.25      | 104      | 100   |        |         |        |
| CycΔ 5                             | 1.25      | 98       | 72    | 28     |         |        |
| CycΔ 6                             | 1.25      | 122      | 40    | 60     |         |        |
| CycΔ 7                             | 1.25      | 108      |       | 90     | 10      |        |
| CycΔ 8                             | 1.25      | 123      | 18    | 70     | 12      |        |
| CycΔ 9                             | 1.25      | 108      |       | 65     | 35      |        |
| CycΔ 10                            | 1.25      | 96       | 70    | 30     |         |        |
| CycΔ 11                            | 1.25      | 94       | 50    | 45     | 5       |        |
| CycΔ 12                            | 1.25      | 106      | 48    | 52     |         |        |

Zebrafish embryos injected with various deletion versions of Cyc mRNA at the one-cell stage were divided into four categories based on the expression pattern of *gsc*: endogenous *gsc* expression (I), mild (II) or massive (III and IV) expansion of the *gsc* expression domains. The dose of injected mRNA (pg), the total number of embryos examined (*n*) and the percentage of embryos (%) in each category are indicated.
