# Supplementary material for: The pro-domain of the zebrafish Nodal-related protein Cyclops regulates its signaling activities
Source: Oxford University Press journal article supplement (doi:10.1242/dev.019794), 2008-06-26
Supplement: dev019794-sup-019794-tables4.pdf [file dev019794-sup-019794-tables4.pdf]

**Table S4. Deletions in the Cyc pro-domain affect its signaling range**

| RNA    | Dose (pg) | <i>ntl</i> |                           |                                   |                          |            | <i>gsc</i> |        |            |
|--------|-----------|------------|---------------------------|-----------------------------------|--------------------------|------------|------------|--------|------------|
|        |           | <i>n</i>   | % short range (in source) | % mid-range (three or four cells) | % long range (4-10 cell) | % not exp. | <i>n</i>   | % exp. | % not exp. |
| Cyc+   | 5         | 35         | 85                        | 12                                | 0                        | 3          | 26         | 4      | 96         |
| CycΔ1  | 5         | 24         | 33                        | 42                                | 21                       | 4          | 20         | 75     | 25         |
| CycΔ3  | 5         | 12         | 83                        | 0                                 | 0                        | 17         | 15         | 0      | 100        |
| CycΔ4  | 5         | 15         | 0                         | 0                                 | 0                        | 100        | 9          | 0      | 100        |
| CycΔ5  | 5         | 14         | 93                        | 0                                 | 0                        | 7          | 11         | 0      | 100        |
| CycΔ6  | 5         | 15         | 60                        | 33                                | 0                        | 7          | 12         | 0      | 100        |
| CycΔ7  | 5         | 16         | 38                        | 56                                | 0                        | 6          | 10         | 40     | 60         |
| CycΔ8  | 5         | 18         | 28                        | 66                                | 0                        | 6          | 8          | 25     | 75         |
| CycΔ9  | 5         | 13         | 69                        | 23                                | 0                        | 8          | 11         | 45     | 55         |
| CycΔ10 | 5         | 16         | 88                        | 0                                 | 0                        | 12         | 14         | 0      | 100        |
| CycΔ11 | 5         | 12         | 66                        | 26                                | 0                        | 8          | 9          | 22     | 78         |
| CycΔ12 | 5         | 14         | 50                        | 43                                | 0                        | 7          | 8          | 16     | 84         |

A single cell of 64-128 cell stage embryos was injected with mRNA encoding the various Cyc deletions, together with a lineage tracer. Expression of *ntl* and *gsc* in the cells around the injected cell was examined and scored. The dose of injected mRNA (pg), the total number of embryos examined (N), and the percentage of embryos (%) in each category are indicated.
