# Supplementary material for: The pro-domain of the zebrafish Nodal-related protein Cyclops regulates its signaling activities
Source: Oxford University Press journal article supplement (doi:10.1242/dev.019794), 2008-06-26
Supplement: dev019794-sup-019794-tables5.pdf [file dev019794-sup-019794-tables5.pdf]

**Table S5. Chimeric Sqt containing region 2 of the Cyc pro-domain has reduced *gsc*-inducing activity compared with Sqt**

| Construct                   | Dose (pg) | <i>n</i> | I (%) | II (%) | III (%) | IV (%) |
|-----------------------------|-----------|----------|-------|--------|---------|--------|
| Cyc+                        | 0.5       | 92       | 59    | 41     |         |        |
| Sqt <sup>proCyc2</sup> :Sqt | 0.5       | 94       | 53    | 47     |         |        |
| Sqt+                        | 0.5       | 85       | 8     | 85     | 7       |        |
| Cyc+                        | 5         | 92       | 16    | 70     | 14      |        |
| Sqt <sup>proCyc2</sup> :Sqt | 5         | 92       | 18    | 68     | 14      |        |
| Sqt+                        | 5         | 83       |       | 16     | 34      | 50     |
| Cyc+                        | 25        | 90       |       | 5      | 40      | 55     |
| Sqt <sup>proCyc2</sup> :Sqt | 25        | 94       |       | 18     | 54      | 28     |
| Sqt+                        | 25        | 89       |       |        | 7       | 93     |

Zebrafish embryos injected with *cyc*, *sqt* or *sqt<sup>proCyc2</sup>:sqt* mRNA at the one-cell stage were divided into four categories based on the expression pattern of *gsc*: endogenous *gsc* expression (I), mild (II) or massive (III and IV) expansion of the *gsc* expression domains. The dose of injected mRNA (pg), the total number of embryos examined (*n*) and the percentage of embryos (%) in each class are indicated.
