# Supplementary material for: The pro-domain of the zebrafish Nodal-related protein Cyclops regulates its signaling activities
Source: Oxford University Press journal article supplement (doi:10.1242/dev.019794), 2008-06-26
Supplement: dev019794-sup-019794-tables6.pdf [file dev019794-sup-019794-tables6.pdf]

**Table S6. Chimeric Sqt with Region 2 of the Cyc pro-domain has reduced *ntl*-inducing activity in comparison with Sqt**

| Construct                   | Dose (pg) | <i>n</i> | I (%) | II (%) | III (%) | IV (%) |
|-----------------------------|-----------|----------|-------|--------|---------|--------|
| Cyc+                        | 0.5       | 85       | 75    | 25     |         |        |
| Sqt <sup>proCyc2</sup> :Sqt | 0.5       | 84       | 67    | 33     |         |        |
| Sqt+                        | 0.5       | 85       | 42    | 53     | 5       |        |
| Cyc+                        | 5         | 90       |       | 22     | 66      | 12     |
| Sqt <sup>proCyc2</sup> :Sqt | 5         | 89       |       | 32     | 29      | 39     |
| Sqt+                        | 5         | 88       |       | 4      | 10      | 86     |
| Cyc+                        | 25        | 83       |       | 10     | 67      | 23     |
| Sqt <sup>proCyc2</sup> :Sqt | 25        | 94       |       | 19     | 33      | 48     |
| Sqt+                        | 25        | 92       |       |        | 5       | 95     |

Zebrfish embryos injected with *cyc*, *sqt* or *sqt<sup>proCyc2</sup>:sqt* mRNA at the one-cell stage were divided into four categories based on the expression pattern of *ntl*: endogenous *ntl* expression (I), mild (II) or massive (III and IV) expansion of the *ntl* expression domains. The dose of injected mRNA (pg), the total number of embryos examined (*n*) and the percentage of embryos (%) in each category are indicated.
