# Supplementary material for: The pro-domain of the zebrafish Nodal-related protein Cyclops regulates its signaling activities
Source: Oxford University Press journal article supplement (doi:10.1242/dev.019794), 2008-06-26
Supplement: dev019794tables7.pdf [file dev019794tables7.pdf]

**Table S7. Region 2 of the Cyc pro-domain restricts the range of signaling of chimeric Sqt**

| RNA                         | Dose<br>(pg) | ntl |               |                       |                      |                    |            | gsc |        |            |
|-----------------------------|--------------|-----|---------------|-----------------------|----------------------|--------------------|------------|-----|--------|------------|
|                             |              | n   | % short range |                       | % long range         |                    | % not exp. | n   | % exp. | % not exp. |
|                             |              |     | In source     | One to<br>three cells | Four to<br>six cells | Six to<br>10 cells |            |     |        |            |
| Cyc+                        | 5            | 32  | 83            | 12                    | 0                    | 0                  | 5          | 35  | 4      | 96         |
| Sqt <sup>proCyc2</sup> :Sqt | 5            | 37  | 0             | 78                    | 14                   | 0                  | 8          | 41  | 12     | 88         |
| Sqt+                        | 5            | 29  | 0             | 8                     | 0                    | 92                 | 0          | 37  | 98     | 2          |

A single cell of 64- to 128-cell stage embryos was injected with *cyc*, *sqt* or *sqt<sup>proCyc2</sup>:sqt* mRNA together with a lineage tracer, and induction of *ntl* and *gsc* in surrounding cells was examined. The dose of injected mRNA (pg), the total number of embryos examined (*n*) and the percentage of embryos (%) in each category are indicated.
